# Supplementary material for: BRAFV600E mutation is highly prevalent in thyroid carcinomas in the young population in Fukushima: a different oncogenic profile from Chernobyl
Source: PubMed Central journal article supplement (PMC4653756; doi:10.1038/srep16976), 2015-11-20
Supplement: srep16976-s1.pdf [file srep16976-s1.pdf]

*Supplementary Information*

***BRAF*<sup>V600E</sup> mutation is highly prevalent in thyroid carcinomas in the young population in Fukushima: a different oncogenic profile from Chernobyl**

Norisato Mitsutake<sup>1,4†\*</sup>, Toshihiko Fukushima<sup>5†</sup>, Michiko Matsuse<sup>1†</sup>, Tatiana Rogounovitch<sup>3</sup>, Vladimir Saenko<sup>2</sup>, Shinya Uchino<sup>7</sup>, Masahiro Ito<sup>6</sup>, Keiji Suzuki<sup>1</sup>, Shinichi Suzuki<sup>5§\*</sup>, Shunichi Yamashita<sup>1,2§</sup>

<sup>1</sup>Department of Radiation Medical Sciences, <sup>2</sup>Department of Health Risk Control, <sup>3</sup>Department of Global Health, Medicine and Welfare, Atomic Bomb Disease Institute, Nagasaki University

<sup>4</sup>Nagasaki University Research Centre for Genomic Instability and Carcinogenesis (NRGIC)

<sup>5</sup>Department of Thyroid and Endocrinology, Fukushima Medical University

<sup>6</sup>Department of Pathology, Nagasaki Medical Centre

<sup>7</sup>Department of Surgery, Noguchi Hospital

†, §These authors contributed equally.

\*Correspondence to:

Norisato Mitsutake, MD PhD, E-mail: [mitsu@nagasaki-u.ac.jp](mailto:mitsu@nagasaki-u.ac.jp)

Shinichi Suzuki, MD PhD, E-mail: [shsuzuki@fmu.ac.jp](mailto:shsuzuki@fmu.ac.jp)

This PDF file includes:

Supplementary Table S1. PCR enzymes and primer sequences

Supplemental Table S1. PCR enzymes and primer sequences

| Gene                   | Primer sequence                                                              | Annealing Temperature (°C) | Amplicon size (bp) | PCR enzyme | Reference                 |
|------------------------|------------------------------------------------------------------------------|----------------------------|--------------------|------------|---------------------------|
| <i>BRAF(ex15)</i>      | 5'-ACATACTTATTGACTCTAAGAGGAAAGATGAA-3'<br>5'-GATTTTTGTGAATACTGGGAACCTATGA-3' | 60                         | 400                | KOD FX     |                           |
| <i>H-RAS(cdn12)</i>    | 5'-AGCAGGGCCCTCCTTGGCAG-3'<br>5'-CAGCCAGCCCTATCCTGGCTG-3'                    | 65                         | 261                | AmpliTaq   |                           |
| <i>H-RAS(cdn61)</i>    | 5'-CAGGGAGAGGCTGGCTGTGTG-3'<br>5'-CCACCTGTGCGGCGTGGGCT-3'                    | 65                         | 298                | ExTaq      |                           |
| <i>K-RAS(cdn12)</i>    | 5'-GGTACTGGTGGAGTATTTGATAGT-3'<br>5'-CTCATGAAAATGGTCAGAGAAACCT-3'            | 60                         | 290                | ExTaq      |                           |
| <i>K-RAS(cdn61)</i>    | 5'-GGTGCCTGTAATAATCCAGACTG-3'<br>5'-CTATAATTACTCCTTAATGTCAGCTT-3'            | 60                         | 268                | ExTaq      |                           |
| <i>N-RAS(cdn12)</i>    | 5'-CACACTAGGGTTTTTCATTTCCATTG-3'<br>5'-GGTAAAGATGATCCGACAAGTGAG-3'           | 63                         | 283                | ExTaq      |                           |
| <i>N-RAS(cdn61)</i>    | 5'-TTGAACTTCCCTCCCTCCCTGC-3'<br>5'-AGCTCTATCTTCCCTAGTGTGGTAA-3'              | 65                         | 316                | AmpliTaq   |                           |
| <i>RET/PTC1</i>        | 5'-GCCTGGAGGACCTCACCAA-3'<br>5'-CTCTGCCTTTCAGATGGAA-3'                       | 56                         | 255                | AmpliTaq   |                           |
| <i>RET/PTC3</i>        | 5'-ACCTGCCAGTGGTTATCAAGC-3'<br>5'-TTCGCCTTCTCCTAGAGTTTTTCC-3'                | 59                         | 150                | AmpliTaq   |                           |
| <i>TERT prom</i>       | 5'-CAGCGCTGCCTGAAACTC-3'<br>5'-GTCCTGCCCTTCCACCTT-3'                         | 63                         | 163                | KOD FX     | Melo <i>et al.</i>        |
| <i>AKAP9/BRAF</i>      | 5'-AGCAAGAACAGTTGATTTTGGGA-3'<br>5'-GCAGACAAACCTGTGGTTGA-3'                  | 63                         | 181                | KOD FX     | Ciampi <i>et al.</i>      |
| <i>ETV6(ex4)/NTRK3</i> | 5'-ACAGCCGGAGGTCATACTGCAT-3'<br>5'-TTGTGTCCCTGACGGAAGTACTG-3'                | 68                         | 207                | KOD FX     |                           |
| <i>ETV6(ex5)/NTRK3</i> | 5'-AAGCCCATCAACCTCTCTCA-3'<br>5'-TCCTCACCCTGATGACAGC-3'                      | 60                         | 139                | AmpliTaq   | Leeman-Neil <i>et al.</i> |

## References:

Melo, M. *et al.* TERT promoter mutations are a major indicator of poor outcome in differentiated thyroid carcinomas. *J. Clin. Endocrinol. Metab.* **99**, E754-765 (2014).  
 Ciampi, R. *et al.* Oncogenic AKAP9-BRAF fusion is a novel mechanism of MAPK pathway activation in thyroid cancer. *J. Clin. Invest.* **115**, 94-101 (2005).  
 Leeman-Neill, R. J. *et al.* ETV6-NTRK3 is a common chromosomal rearrangement in radiation-associated thyroid cancer. *Cancer* **120**, 799-807 (2014).
